# Supplementary material
Source: Springer Nature journal article supplement (https://www.springermedizin.de/resource/supplementary/12947_2012_439_MOESM4_ESM.pdf/9555760)

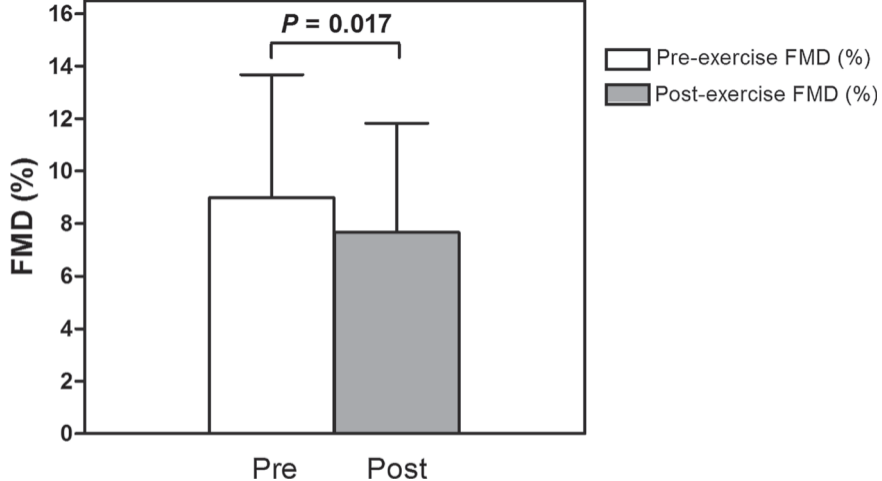

|                       | Pre-exercise FMD (%) | Post-exercise FMD (%) | P-value |
|-----------------------|----------------------|-----------------------|---------|
| <b>Total (N = 74)</b> | 8.98 ± 4.69          | 7.51 ± 4.03           | 0.017   |

Supplement: MOESM4 [file 9555760]
